# Supplementary material for: Combining Ability and Heterotic Patterns of Tropical Early-Maturing Maize Inbred Lines under Individual and Combined Heat and Drought Environments
Source: MDPI journal article supplement (doi:10.3390/plants11101365), 2022-05-20
Supplement: s1 [file s1]

**Supplementary Table S5. Description codes of hybrids and environments used for the GGE biplot analysis.**

| <b>Hybrid</b>                                       | <b>code</b> |
|-----------------------------------------------------|-------------|
| TZEI135xTZEI182                                     | 1           |
| TZEI135xTZEI501                                     | 4           |
| TZEI135xTZEI422                                     | 5           |
| TZEI417xTZEI446                                     | 8           |
| TZEI502xTZEI422                                     | 25          |
| TZEI446xTZEI480                                     | 37          |
| TZEI446xTZEI498                                     | 38          |
| TZEI446xTZEI528                                     | 40          |
| TZEI501xTZEI528                                     | 45          |
| TZEI17xTZEI135                                      | 51          |
| TZEI17xTZEI417                                      | 52          |
| TZEI498xTZEI135                                     | 61          |
| TZEI23xTZEI135                                      | 66          |
| TZEI23xTZEI523                                      | 69          |
| TZEI1013xTZEI272                                    | 80          |
| TZEI18xTZEI268                                      | 84          |
| TZEI18xTZEI272                                      | 85          |
| TZEI763xTZEI272                                     | 90          |
| TZEI240xTZEI1517                                    | 101         |
| TZEI56xTZEI1517                                     | 111         |
| TZEI56xTZEI935                                      | 115         |
| TZEI272xTZEI31                                      | 123         |
| TZEI272xTZEI935                                     | 125         |
| TZEI1517xTZEI242                                    | 129         |
| TZEI7xTZEI763                                       | 133         |
| TZEI1496xTZEI242                                    | 144         |
| TZEI1496xTZEI188                                    | 145         |
| TZEI935xTZEI188                                     | 150         |
| Check 5 - TZE-W Pop DT STR x TZEI 7                 | 155         |
| Check 6 - TZEI 86 x TZEI 60                         | 156         |
| <b>Environments</b>                                 | <b>code</b> |
| Manga under Combined heat and drought stress, 2018  | CHDMA       |
| Kadawa under Combined heat and drought stress, 2018 | CHDKB       |
| Manga under Combined heat and drought stress, 2019  | CHDMC       |
| Kadawa under Combined heat and drought stress, 2019 | CHDMD       |
| Manga under HS, 2018                                | HSME        |
| Manga under HS, 2019                                | HSMF        |
| Manga under TDS, 2018                               | TDMG        |
| Manga under TDS, 2019                               | TDMH        |
