# Supplementary material for: Combining Ability and Heterotic Patterns of Tropical Early-Maturing Maize Inbred Lines under Individual and Combined Heat and Drought Environments
Source: MDPI journal article supplement (doi:10.3390/plants11101365), 2022-05-20
Supplement: s1 [file s1]

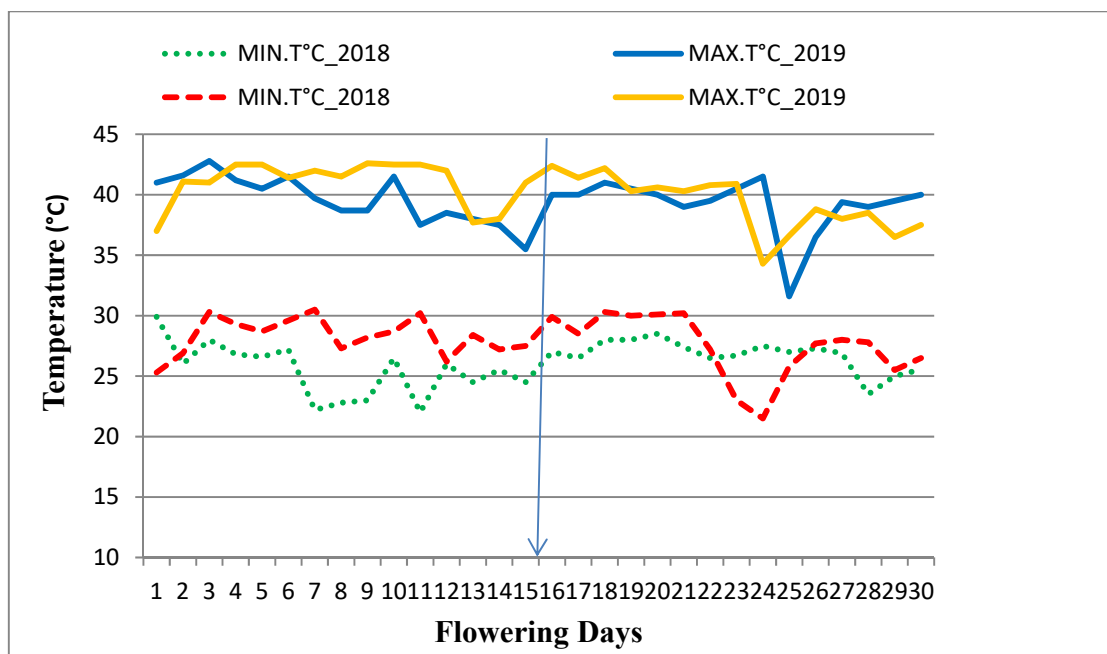

**Supplementary figure S1a. Mean temperature (minimum and maximum) at Manga during the flowering and grain filling periods during (April) the 2018/2019 cropping season.**

**MIN= Minimum Temperature, MAX= Maximum Temperature, °C= Degrees Celsius**

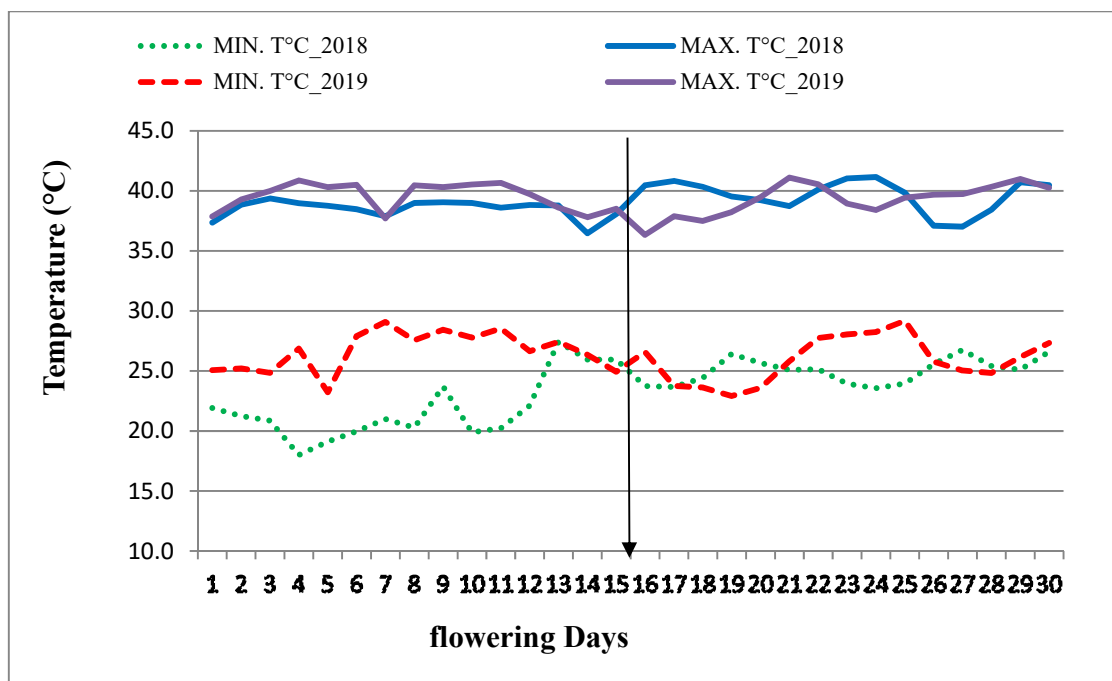

**Supplementary figure S1b. Mean temperature (minimum and maximum) at Kadawa during the flowering and grain filling periods during (April) the 2018/2019 cropping season.**

**MIN= Minimum Temperature, MAX.= Maximum Temperature, °C= Degrees Celsius**
